# Supplementary material for: Clostridium perfringens Type E Virulence Traits Involved in Gut Colonization
Source: PLoS One. 2015 Mar 23;10(3):e0121305. doi: 10.1371/journal.pone.0121305 (PMC4370460; doi:10.1371/journal.pone.0121305)

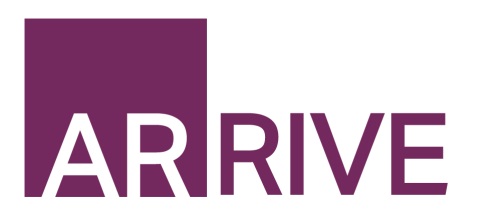


The ARRIVE Guidelines Checklist

Animal Research: Reporting In Vivo Experiments

Carol Kilkenny1, William J Browne2, Innes C Cuthill3, Michael Emerson4 and Douglas G Altman5

*1The National Centre for the Replacement, Refinement and Reduction of Animals in Research, London, UK, 2School of Veterinary Science, University of Bristol, Bristol, UK, 3School of Biological Sciences, University of Bristol, Bristol, UK, 4National Heart and Lung Institute, Imperial College London, UK, 5Centre for Statistics in Medicine, University of Oxford, Oxford, UK.*

|  | | ITEM | RECOMMENDATION | Section/ Paragraph |
| --- | --- | --- | --- | --- |
| 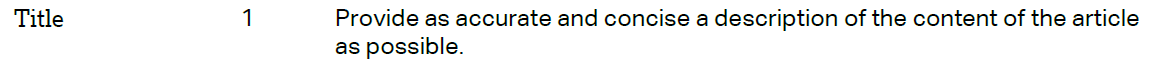 | | | Title. |
| 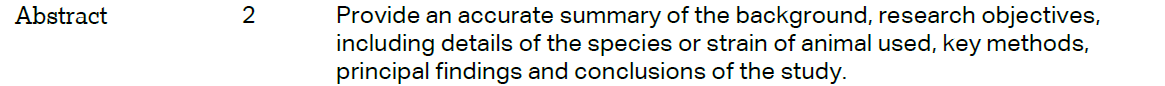 | | | Abstract. |
| INTRODUCTION | | |  |
| 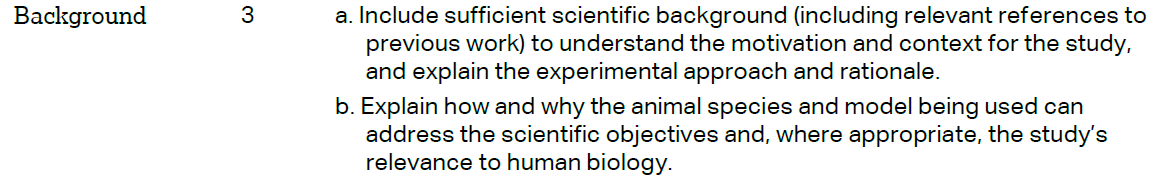 | | | Introduction/ 1st, 2nd paragraph. Introduction/3rd paragraph. |
| 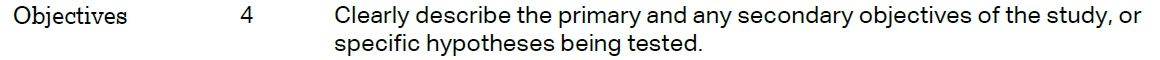 | | | Introduction/ 4th paragraph. |
| METHODS | | |  |
| 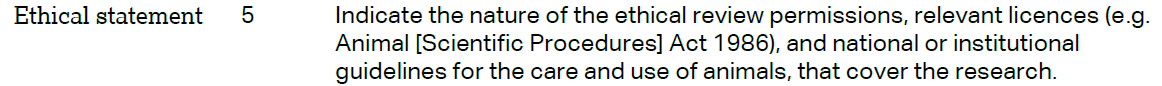 | | | Materials and methods/ Institutional Animal Care and Use Committee (IACUC) Approval |
| 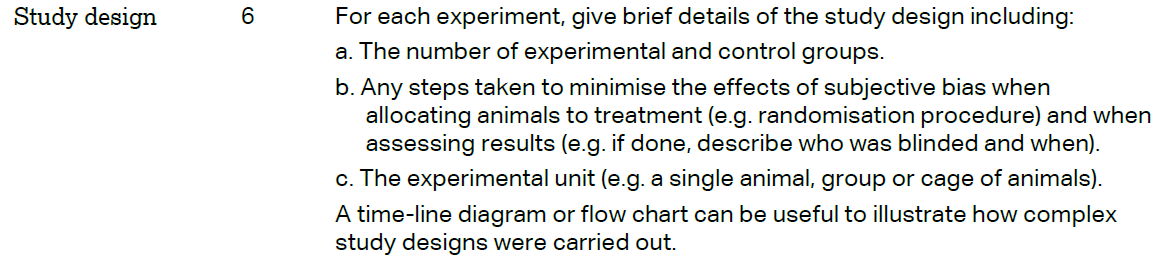 | | | Materials and methods/Mice experiments |
| 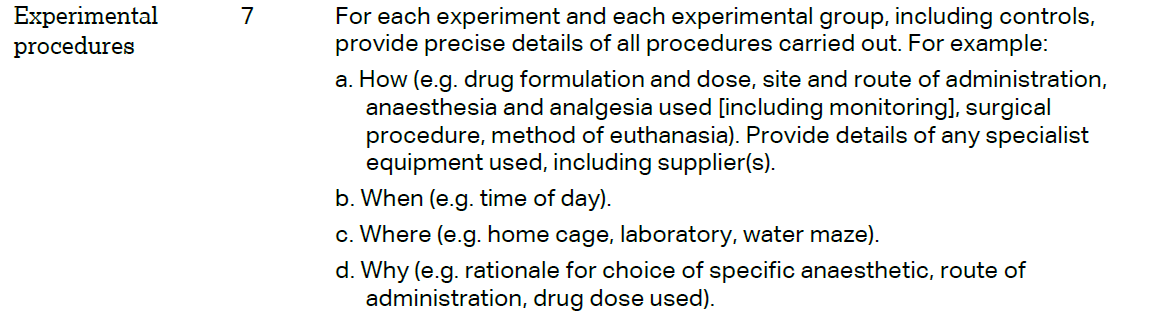 | | | Materials and methods/Mice experiments |
| 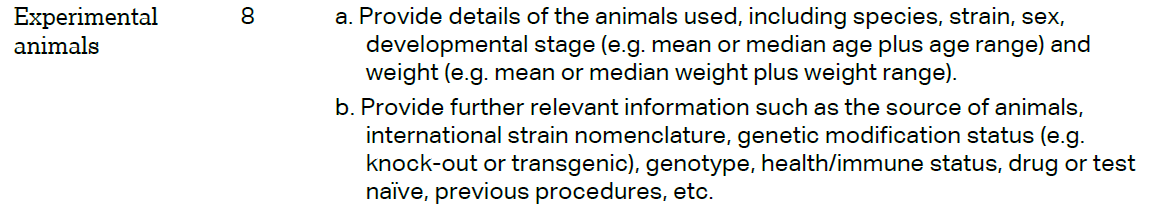 | | | Materials and methods/Mice experiments |

The ARRIVE guidelines. Originally published in *PLoS Biology*, June 20101

| 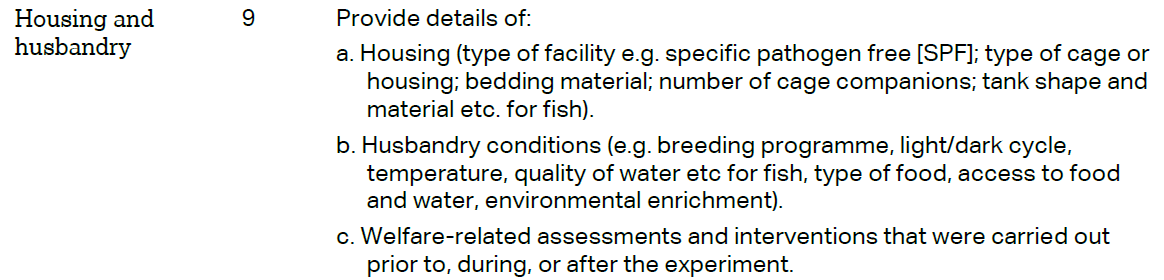 | Materials and methods/Mice experiments | |
| --- | --- | --- |
| 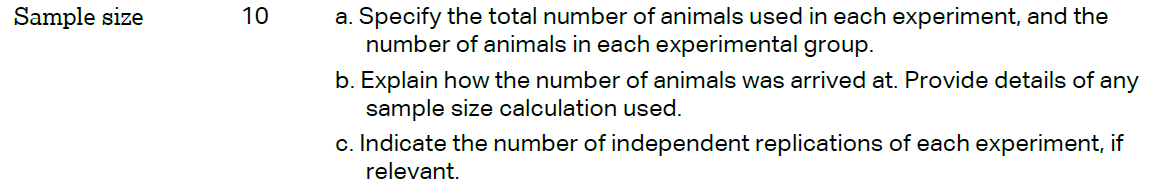 | Materials and methods/Mice experiments | |
| 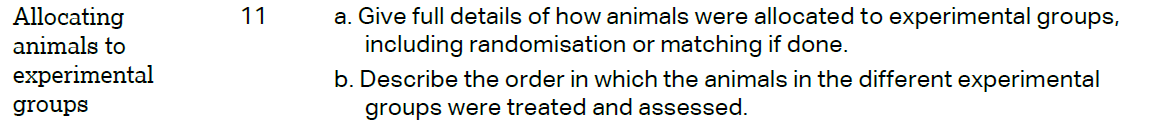 | Materials and methods/Mice experiments | |
| 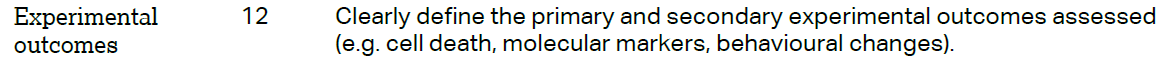 | Materials and methods/Mice experiments | |
| 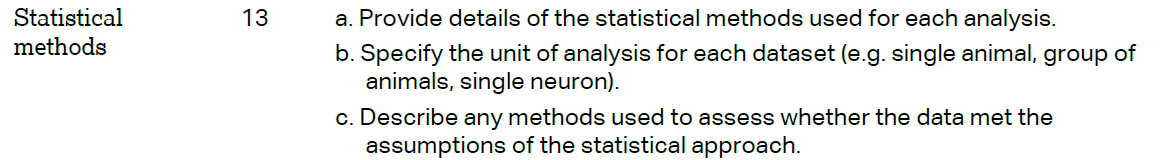 | Materials and methods/Statistical analyses | |
| RESULTS |  | |
| 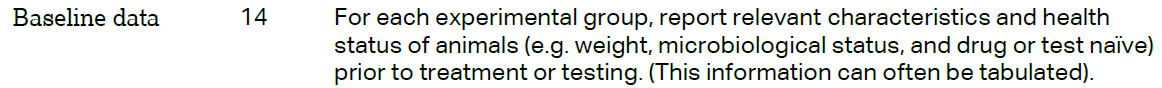 | Results/ Type E bacteria reduce intestinal colonization by type A strains *in-vivo*. | |
| 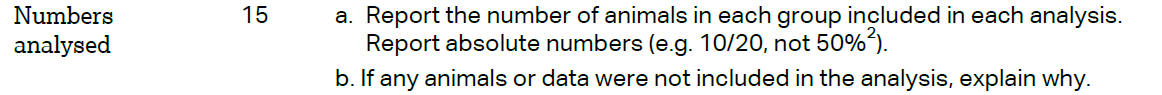 | Results/ Type E bacteria reduce intestinal colonization by type A strains *in-vivo*. | |
| 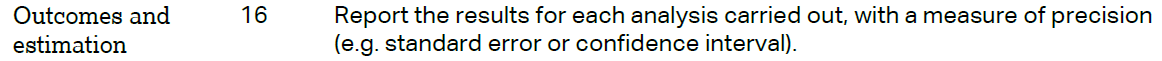 | Results/ Type E bacteria reduce intestinal colonization by type A strains *in-vivo*. | |
| 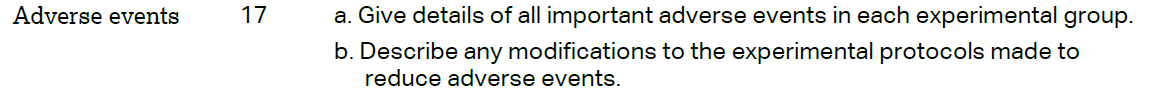 | Results/ Type E bacteria reduce intestinal colonization by type A strains *in-vivo*. | |
| DISCUSSION |  | |
| 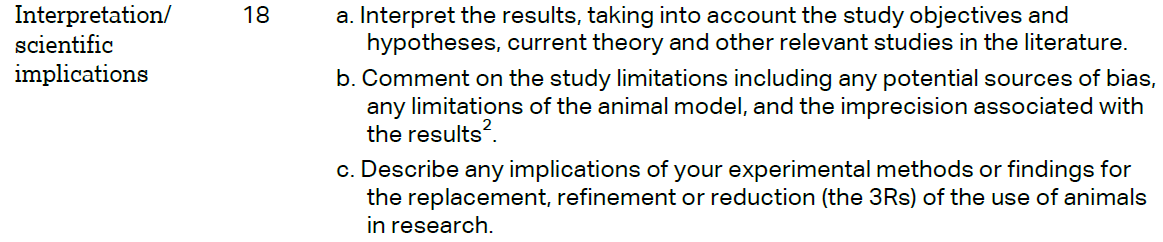 | Discussion/1st, 2nd, 3rd paragraph.  Discussion/4th, 5th paragraph.  Discussion/4th paragraph. | |
| 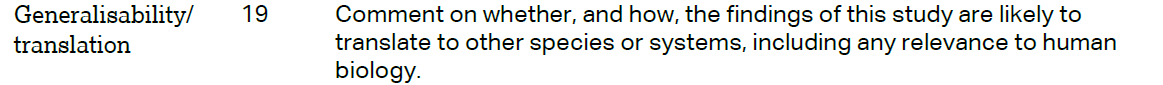 | Discussion/ 2nd, 3rd paragraph. | |
| 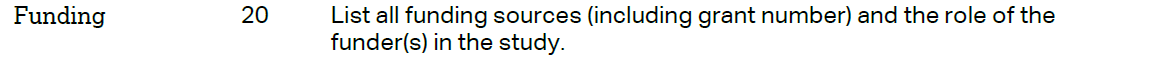 | | Acknowledgements |


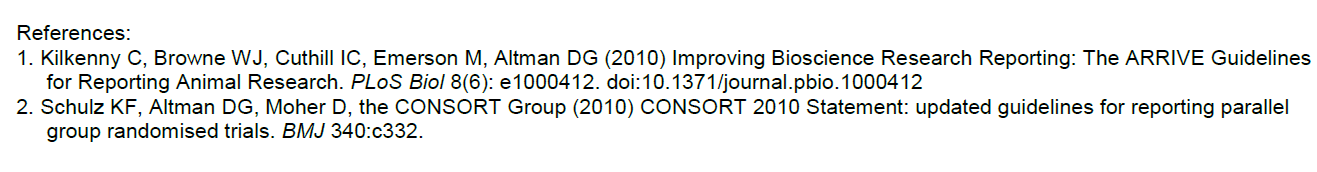

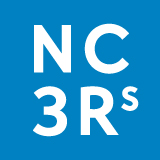

Supplement: S1 Checklist — (DOCX) [file pone.0121305.s001.docx]
